# Supplementary material for: Exploring U.S. Food System Workers’ Intentions to Work While Ill during the Early COVID-19 Pandemic: A National Survey
Source: MDPI journal article supplement (doi:10.3390/ijerph20021638), 2023-01-16
Supplement: s1 [file s1]

**Table S3.** Sensitivity analyses for associations between variables of interest and odds ratio for COVID-19 presenteeism intentions within a national sample of food system workers in the U.S.

| <b>Subgroup:</b>                           | <b>Respondents reporting customer interaction</b>   | <b>Respondents who were "Required" to work</b>     | <b>Accounting for state-level clustering</b> |
|--------------------------------------------|-----------------------------------------------------|----------------------------------------------------|----------------------------------------------|
|                                            | <b>Odds Ratio<br/>95% CI<br/>P value<br/>N=1171</b> | <b>Odds Ratio<br/>95% CI<br/>P value<br/>N=664</b> | <b>Odds Ratio<br/>95% CI<br/>P value</b>     |
| <b>Organizational Safety Climate Score</b> |                                                     |                                                    |                                              |
| Low                                        | Ref                                                 | Ref                                                | Ref                                          |
| High                                       | 0.70<br>0.43, 1.11<br>0.13                          | 0.53<br>0.31, 0.90<br>0.02                         | 0.63<br>0.42, 0.94<br>0.02                   |
| <b>Quantitative Work Demands</b>           |                                                     |                                                    |                                              |
| Low                                        | Ref                                                 | Ref                                                | Ref                                          |
| High                                       | 1.52<br>0.93, 2.51<br>0.10                          | 1.29<br>1.73, 2.27<br>0.38                         | 1.51<br>1.00, 2.30<br>0.05                   |
| <b>USDA Food Security Category</b>         |                                                     |                                                    |                                              |
| High                                       | Ref                                                 | Ref                                                | Ref                                          |
| Low                                        | 1.52<br>0.85, 2.76<br>0.16                          | 1.26<br>0.66, 2.41<br>0.48                         | 2.18<br>1.35, 3.50<br>0.001                  |
| Very low                                   | 2.87<br>1.62, 5.08<br><0.001                        | 1.39<br>0.72, 2.71<br>0.33                         | 2.37<br>1.41, 3.98<br>0.001                  |
| <b>Access to paid leave</b>                |                                                     |                                                    |                                              |
| No                                         | Ref                                                 | Ref                                                | Ref                                          |
| Yes                                        | 1.22                                                | 0.82                                               | 1.18                                         |

|                                                                                                     |                             |                             |                              |
|-----------------------------------------------------------------------------------------------------|-----------------------------|-----------------------------|------------------------------|
|                                                                                                     | 0.71, 2.08<br>0.71          | 0.44, 1.53<br>0.53          | 0.74, 1.87<br>0.49           |
| <b>"It is worth the health risk to reopen the economy as soon as possible"</b><br>Strongly/disagree | Ref                         | Ref                         | Ref                          |
| Neutral                                                                                             | 1.45<br>0.85, 2.49<br>0.18  | 1.99<br>1.07, 3.69<br>0.03  | 1.47<br>0.93, 2.32<br>0.10   |
| Strongly/Agree                                                                                      | 2.57<br>1.46, 4.52<br>0.001 | 2.63<br>1.37, 5.05<br>0.004 | 2.40<br>1.47, 3.92<br><0.001 |
| <b>Food System Sector</b>                                                                           |                             |                             |                              |
| Retail                                                                                              | Ref                         | Ref                         | Ref                          |
| Production                                                                                          | 3.66<br>1.03, 13.04<br>0.05 | 2.50<br>0.69, 9.13<br>0.16  | 3.73<br>1.72, 8.11<br>0.001  |
| Processing                                                                                          | 0.73<br>0.15, 3.56<br>0.70  | 0.80<br>0.31, 2.08<br>0.65  | 1.19<br>0.54, 2.62<br>0.67   |
| Distribution                                                                                        | 2.10<br>0.66, 6.68<br>0.21  | 1.97<br>0.56, 6.94<br>0.29  | 2.31<br>0.85, 6.26<br>0.10   |
| Restaurant/Service                                                                                  | 1.03<br>0.56, 1.90<br>0.92  | 0.86<br>.40, 1.86<br>0.70   | 1.25<br>0.72, 2.17<br>0.43   |
| Food Assistance                                                                                     | 0.51<br>0.12, 2.41<br>0.40  | 0.40<br>.07, 2.21<br>0.30   | 0.43<br>0.09, 1.99<br>0.28   |
