# Supplementary material for: Exploring U.S. Food System Workers’ Intentions to Work While Ill during the Early COVID-19 Pandemic: A National Survey
Source: MDPI journal article supplement (doi:10.3390/ijerph20021638), 2023-01-16
Supplement: s1 [file s1]

**Table S4.** Comparisons between groups reporting presenteeism intentions versus not and variables of interest in a national sample of food system workers during early COVID-19.

|                             |                     | "If I was sick with COVID-19, but I was still able to work, I would go to work." |                    |         |
|-----------------------------|---------------------|----------------------------------------------------------------------------------|--------------------|---------|
|                             |                     | Did not agree                                                                    | Agree              | p value |
|                             |                     | N=2313                                                                           | N= 222             |         |
|                             |                     | n (%) or Mean (SD)                                                               | n (%) or Mean (SD) |         |
| Demographics                |                     |                                                                                  |                    |         |
| Age, m(sd)                  |                     | 46.06 (11.27)                                                                    | 43.75 (10.78)      | 0.004   |
|                             |                     |                                                                                  |                    |         |
| Race (n=2527)               | White               | 1,991 (86.3)                                                                     | 182 (82.3)         | 0.26    |
|                             | African American    | 100 (4.3)                                                                        | 12 (5.4)           |         |
|                             | Other / Mixed race  | 215 (9.3)                                                                        | 27 (12.2)          |         |
| Ethnicity (n=2440)          | Not Hispanic/Latinx | 2008 (90.3)                                                                      | 188 (87.4)         | 0.19    |
|                             | Hispanic/Latinx     | 217 (9.8)                                                                        | 27 (12.6)          |         |
|                             | Hispanic/Latinx     | 217 (9.8)                                                                        | 27 (12.6)          |         |
| Gender (n=2535)             | Female              | 1,521 (65.8)                                                                     | 120 (54.1)         | <0.001  |
|                             | Male                | 754 (32.6)                                                                       | 92 (41.4)          |         |
|                             | Other Answer        | 38 (1.6)                                                                         | 10 (4.5)           |         |
| Sector (n=2535)             | Production          | 87 (3.8)                                                                         | 28 (12.6)          | <0.001  |
|                             | Processing          | 203 (8.8)                                                                        | 24 (10.8)          |         |
|                             | Distribution        | 52 (2.3)                                                                         | 8 (3.6)            |         |
|                             | Retail              | 818 (35.4)                                                                       | 66 (29.7)          |         |
|                             | Restaurant/Service  | 1006 (43.5)                                                                      | 91 (41.0)          |         |
|                             | Food Assistance     | 147 (6.4)                                                                        | 5 (2.3)            |         |
| Income (n=2330)             | < \$25,000          | 586 (27.5)                                                                       | 56 (27.9)          | 0.17    |
|                             | \$25,000 – 34,999   | 385 (18.1)                                                                       | 42 (20.9)          |         |
|                             | \$35,000 – 49,999   | 382 (17.9)                                                                       | 45 (22.4)          |         |
|                             | \$50,000 – 99,000   | 45 (30.3)                                                                        | 51 (25.4)          |         |
|                             | > \$100,000         | 131 (6.2)                                                                        | 7 (3.5)            |         |
| U.S. Census Region (n=2375) | Northeast           | 388 (17.9)                                                                       | 39 (19.1)          | 0.97    |
|                             | Midwest             | 599 (27.6)                                                                       | 55 (27.0)          |         |
|                             | South               | 785 (36.2)                                                                       | 72 (35.3)          |         |
|                             | West                | 399 (18.4)                                                                       | 38 (18.6)          |         |
| Occupational Attributes     |                     |                                                                                  |                    |         |
| Union Status (n=2471)       | Non-Union Member    | 1796 (79.6)                                                                      | 169 (79.0)         | 0.84    |
|                             | Union Member        | 461 (20.4)                                                                       | 45 (21.0)          |         |

|                                                                                          |                   |             |             |        |
|------------------------------------------------------------------------------------------|-------------------|-------------|-------------|--------|
| Employer Size<br>(n=2454)                                                                | 1 – 10            | 288 (12.9)  | 28 (13.0)   | 0.04   |
|                                                                                          | 11 - 49           | 745 (33.3)  | 68 (31.6)   |        |
|                                                                                          | 50 - 499          | 1030 (46.0) | 90 (41.9)   |        |
|                                                                                          | More than 500     | 176 (7.9)   | 29 (13.5)   |        |
| Full-time/part-time<br>status(n=2332)                                                    | Full Time         | 1376 (64.5) | 134 (67.3)  | 0.01   |
|                                                                                          | Part Time         | 609 (28.6)  | 42 (21.1)   |        |
|                                                                                          | Other             | 148 (6.9)   | 23 (11.6)   |        |
| Customer Contact<br>(n=2523)                                                             | No                | 546 (23.7)  | 59 (26.9)   | 0.29   |
|                                                                                          | Yes               | 1758 (76.3) | 160 (73.1)  |        |
| Access to Paid Leave<br>(n=2527)                                                         | No                | 1660 (72.0) | 168 (75.7)  | 0.25   |
|                                                                                          | Yes               | 645 (28.0)  | 54 (24.3)   |        |
| Employer granted<br>"easier" access to sick<br>leave (n=2527)                            | No                | 1596 (69.2) | 170 (76.6)  | 0.02   |
|                                                                                          | Yes               | 709 (30.8)  | 52 (23.4)   |        |
| Work Demands<br>(n=2464)                                                                 |                   | 46.0 (24.4) | 54.0 (25.7) | <0.001 |
| Safety Climate<br>(n=2373)                                                               |                   | 17.7 (4.4)  | 15.9 (4.9)  | <0.001 |
| Social Support<br>(n=2287)                                                               |                   | 67.2 (21.8) | 59.4 (23.3) | <0.001 |
| Required to Work<br>(n=2420)                                                             | Required          | 702 (31.2)  | 90 (42.3)   | 0.006  |
|                                                                                          | Asked             | 580 (26.3)  | 43 (20.2)   |        |
|                                                                                          | Both              | 292 (13.2)  | 32 (15.0)   |        |
|                                                                                          | Neither           | 633 (28.7)  | 48 (22.5)   |        |
| Non-occupational attributes                                                              |                   |             |             |        |
| Food Security Status<br>since pandemic<br>declaration (n=2374)                           | High or marginal  | 1317 (60.7) | 82 (40.2)   | <0.001 |
|                                                                                          | Low               | 441 (20.3)  | 64 (31.4)   |        |
|                                                                                          | Very low          | 412 (19.0)  | 58 (28.4)   |        |
| It is worth the health<br>risk to reopen the<br>economy as soon as<br>possible. (n=2114) | Strongly/Disagree | 829 (43.0)  | 58 (31.4)   | <0.001 |
|                                                                                          | Neither           | 697 (36.1)  | 63 (34.1)   |        |
|                                                                                          | Agree/Disagree    | 403 (20.9)  | 64 (34.6)   |        |
|                                                                                          | Strongly/Agree    |             |             |        |
