# Supplementary material for: Exploring U.S. Food System Workers’ Intentions to Work While Ill during the Early COVID-19 Pandemic: A National Survey
Source: MDPI journal article supplement (doi:10.3390/ijerph20021638), 2023-01-16
Supplement: s1 [file s1]

**Table S6.** Comparison of participants who self-selected to provide additional comments on their decision to attend work with non-commentors and entire sample.

|                  |                        | Commentors           | Non-<br>commentors   |         | Total Sample      |
|------------------|------------------------|----------------------|----------------------|---------|-------------------|
|                  |                        | n (%) or mean,<br>SD | n (%) or mean,<br>SD | p value | n (%) or mean, SD |
| Total N          |                        | N=460                | N=2,939              |         | N=3,399           |
| Sector           |                        |                      |                      |         |                   |
| (n=460)          | Production             | 15 (3.3)             | 155 (5.3)            | 0.02    | 170 (5.0)         |
|                  | Processing             | 39 (8.5)             | 262 (8.9)            |         | 301 (8.9)         |
|                  | Distribution           | 21 (4.6)             | 61 (2.1)             |         | 82 (2.4)          |
|                  | Retail                 | 155 (33.7)           | 1000 (34.0)          |         | 1,155 (33.4)      |
|                  | Restaurant/<br>Service | 200 (43.5)           | 1285 (43.7)          |         | 1,485 (43.7)      |
|                  | Assistance             | 30 (6.5)             | 176 (6.0)            |         | 206 (6.1)         |
| Age              |                        |                      |                      |         |                   |
| (n=460)          | Mean, SD               | 44.5 (11.2)          | 46.1 (11.3)          | 0.003   | 46.0 (11.3)       |
| Gender           |                        |                      |                      |         |                   |
| (n=460)          | Female                 | 317 (68.9)           | 1890 (64.3)          | 0.156   | 2,207 (65.0)      |
|                  | Male                   | 134 (29.1)           | 985 (33.5)           |         | 1,119 (32.9)      |
|                  | Other                  | 9 (2.0)              | 64 (2.2)             |         | 73 (2.2)          |
| Race             |                        |                      |                      |         |                   |
| (n=459)          | White                  | 386 (84.1)           | 2504 (85.6)          | 0.525   | 2,890 (85.4)      |
|                  | Non-White              | 73 (15.9)            | 426 (14.6)           |         | 495 (14.6)        |
| Ethnicity        |                        |                      |                      |         |                   |
| (n=448)          | Hispanic               | 43 (9.6)             | 2514 (89.0)          | 0.382   | 353 (10.8)        |
|                  | Non-Hispanic           | 405 (90.4)           | 310 (11.0)           |         | 2,919 (89.2)      |
| Income           |                        |                      |                      |         |                   |
| (n=445)          | <10,000                | 10 (2.2)             | 93 (4.8)             | 0.02    | 103 (4.3)         |
|                  | 10,000 - 15,000        | 27 (6.1)             | 150 (7.7)            |         | 177 (7.4)         |
|                  | 15,-000 - 24,999       | 71 (16.0)            | 310 (15.9)           |         | 381 (15.9)        |
|                  | 25,000 - 34,999        | 88 (19.8)            | 353 (18.1)           |         | 441 (18.5)        |
|                  | 35,000 - 49,999        | 78 (17.5)            | 356 (18.3)           |         | 434 (18.2)        |
|                  | 50,000 - 74,999        | 97 (21.8)            | 385 (19.8)           |         | 482 (20.2)        |
|                  | 75,000 - 99,999        | 56 (12.6)            | 173 (8.9)            |         | 229 (9.6)         |
|                  | >= 100,000             | 18 (4.0)             | 125 (6.4)            |         | 143 (6.0)         |
| U.S. Region      |                        |                      |                      |         |                   |
| (n=443)          | Northeast              | 80 (18.1)            | 488 (17.9)           | 0.661   | 568 (17.9)        |
|                  | South                  | 119 (26.9)           | 758 (27.8)           |         | 877 (27.7)        |
|                  | Midwest                | 170 (38.4)           | 975 (35.7)           |         | 1145 (36.1)       |
|                  | West                   | 74 (16.7)            | 507 (18.6)           |         | 581 (18.3)        |
| Union Membership |                        |                      |                      |         |                   |
| (n=451)          | Non-union              | 354 (78.5)           | 2285 (80.1)          | 0.423   | 2639 (79.6)       |
|                  | Union                  | 97 (21.5)            | 567 (19.9)           |         | 664 (20.5)        |
| Job Pay Status   |                        |                      |                      |         |                   |

|                                                                                  |                        |            |              |        |              |
|----------------------------------------------------------------------------------|------------------------|------------|--------------|--------|--------------|
| (n=441)                                                                          | Hourly                 | 325 (73.7) | 1468 (75.4)  |        | 1793 (75.1)  |
|                                                                                  | Hourly with tips       | 49 (11.1)  | 49 (2.5)     |        | 195 (8.2)    |
|                                                                                  | Salary                 | 67 (15.2)  | 333 (17.1)   | <0.001 | 400 (16.8)   |
| Full/Part-time status                                                            |                        |            |              |        |              |
| (n=443)                                                                          | Full time              | 258 (58.2) | 1291 (66.3)  |        | 1,549 (64.8) |
|                                                                                  | Part time              | 125 (28.2) | 544 (27.9)   |        | 669 (28.0)   |
|                                                                                  | Other                  | 60 (13.5)  | 113 (5.8)    | <0.001 | 173 (7.2)    |
| Customer Status                                                                  |                        |            |              |        |              |
| (n=459)                                                                          | No customers           | 105 (22.9) | 697 (23.9)   |        | 802 (23.8)   |
|                                                                                  | Yes customers          | 354 (77.1) | 2219 (76.1)  | 0.631  | 2573 (76.2)  |
| Organization Size                                                                |                        |            |              |        |              |
| (n=451)                                                                          | 1 to 10                | 49 (10.9)  | 391 (13.8)   |        | 440 (13.4)   |
|                                                                                  | 11 to 49               | 157 (34.8) | 357 (12.6)   |        | 1114 (34.0)  |
|                                                                                  | 50 - 499               | 211 (46.8) | 1237 (43.7)  |        | 1448 (44.2)  |
|                                                                                  | >=500                  | 34 (7.5)   | 244 (8.6)    | 0.26   | 278 (8.5)    |
| USDA Food Security Score                                                         |                        |            |              |        |              |
| (n=414)                                                                          | High or marginal       | 234 (56.5) | 1065 (60.2)  |        | 1299 (59.5)  |
|                                                                                  | Low food security      | 84 (20.3)  | 379 (21.4)   |        | 463 (21.2)   |
|                                                                                  | Very low food security | 96 (23.2)  | 325 (18.4)   | 0.082  | 421 (19.3)   |
| " If I was sick with COVID-19, but I was still able to work, I would go to work" |                        |            |              |        |              |
| (n=2,535)                                                                        | Agree                  | 40 (9.0)   | 182 (8.7)    |        | 222 (8.8)    |
|                                                                                  | Do not agree           | 405 (91.0) | 1,908 (91.3) | 0.849  | 2,313 (91.2) |
