# Supplementary material for: Exploring U.S. Food System Workers’ Intentions to Work While Ill during the Early COVID-19 Pandemic: A National Survey
Source: MDPI journal article supplement (doi:10.3390/ijerph20021638), 2023-01-16
Supplement: s1 [file s1]

**Table S5.** Model results for non-exposure variables considered for and included in the multivariable model. <sup>+</sup>

| Presenteeism Intentions<br>(Measured by agreeing with the statement,<br><i>"If I was sick with COVID-19, but I was still able to work, I would go to work"</i> ) |                                                                  |                                                                                  |
|------------------------------------------------------------------------------------------------------------------------------------------------------------------|------------------------------------------------------------------|----------------------------------------------------------------------------------|
|                                                                                                                                                                  | Unadjusted Odds Ratio<br>95% Confidence Interval<br>P value<br>N | Adjusted Odds Ratio <sup>+</sup><br>95% Confidence Interval<br>P value<br>N=1793 |
| Age                                                                                                                                                              | 0.98<br>0.97, 0.99<br>0.004                                      | 1.00<br>0.98, 1.01<br>0.84                                                       |
| Gender                                                                                                                                                           |                                                                  |                                                                                  |
| Female                                                                                                                                                           | Ref                                                              | Ref                                                                              |
| Male                                                                                                                                                             | 1.55<br>1.16, 2.06<br>0.003                                      | 1.19<br>0.83, 1.70<br>0.35                                                       |
| Other Response                                                                                                                                                   | 3.33<br>1.62, 6.86<br>0.001<br>N=2535                            | 0.99<br>0.12, 7.95<br>0.99                                                       |
| Race                                                                                                                                                             |                                                                  |                                                                                  |
| White                                                                                                                                                            | Ref                                                              | Ref                                                                              |
| African American                                                                                                                                                 | 1.29<br>0.68, 2.46<br>0.432                                      | 1.28<br>0.60, 2.73<br>0.52                                                       |
| Other or > 1 Race                                                                                                                                                | 1.37<br>0.91, 2.10<br>0.134<br>N=2527                            | 0.80<br>0.41, 1.55<br>0.50                                                       |
| Ethnicity                                                                                                                                                        |                                                                  |                                                                                  |
| Non-Hispanic/Latinx                                                                                                                                              | Ref                                                              |                                                                                  |
| Hispanic/Latinx                                                                                                                                                  | 1.32                                                             | 0.78                                                                             |

|                     |                    |                                       |                            |
|---------------------|--------------------|---------------------------------------|----------------------------|
|                     |                    | 0.87, 2.04<br>0.192<br>N=2440         | 0.40, 1.52<br>0.47         |
| Region              | Northeast          | Ref                                   | --                         |
|                     | South              | 0.91<br>0.59, 1.40<br>0.680           | --                         |
|                     | Midwest            | 0.91<br>0.61, 1.37<br>0.660           | --                         |
|                     | West               | 0.95<br>0.59, 1.51<br>0.821<br>N=2375 | --                         |
| Full/Part-time      |                    |                                       |                            |
| status              | Full-time          | Ref                                   | Ref                        |
|                     | Part-time          | 0.71<br>0.49, 1.01<br>0.06            | 0.77<br>0.50, 1.18<br>0.23 |
|                     | Other              | 1.60<br>0.99, 2.56<br>0.053<br>N=2332 | 1.41<br>0.80, 2.50<br>0.24 |
|                     |                    |                                       |                            |
|                     |                    |                                       |                            |
| Job tenure          | Less than one year | Ref                                   | --                         |
|                     | 1-2 years          | 1.51<br>0.85, 2.68<br>0.162           | --                         |
|                     | 3-5 years          | 1.75<br>1.01, 3.05<br>0.046           | --                         |
|                     | 6-10 years         | 1.46<br>0.81, 2.65<br>0.210           | --                         |
|                     | More than 10 years | 0.97<br>0.81, 2.65<br>0.925<br>N=2334 | --                         |
|                     |                    |                                       |                            |
|                     |                    |                                       |                            |
| Household<br>Income | < \$25,000         | Ref                                   | --                         |
|                     | \$25,000 – 34,999  | 1.14                                  | --                         |

|              |                       |                               |            |
|--------------|-----------------------|-------------------------------|------------|
|              |                       | 0.75, 1.74<br>0.537           |            |
|              | \$35,000 – 49,999     | 1.24                          | --         |
|              |                       | 0.82, 1.86<br>0.99            |            |
|              | \$50,000 – 99,000     | 0.83                          | --         |
|              |                       | 0.56, 1.23<br>0.348           |            |
|              | ≥ \$100,000           | 0.56                          | --         |
|              |                       | 0.25, 1.25<br>0.159<br>N=2330 |            |
| Organization |                       |                               |            |
| Size         | 10 or fewer employees | Ref                           | Ref        |
|              | 11 -- 49              | 0.94                          | 0.84       |
|              |                       | 0.59, 1.49                    | 0.46, 1.53 |
|              |                       | 0.788                         | 0.57       |
|              | 50 – 499              | 0.9                           | 0.87       |
|              |                       | 0.58, 1.40                    | 0.47, 1.62 |
|              |                       | 0.637                         | 0.66       |
|              | More than 500         | 1.69                          | 1.14       |
|              |                       | 0.98, 2.94                    | 0.49, 1.65 |
|              |                       | 0.061                         | 0.77       |
|              |                       | N=2454                        |            |
| Sector       | Retail                | Ref                           | Ref        |
|              | Production            | 3.99                          | 3.96       |
|              |                       | 2.43, 6.54                    | 1.98, 7.92 |
|              |                       | <0.001                        | <0.001     |
|              | Processing            | 1.47                          | 1.29       |
|              |                       | 0.90, 2.40                    | 0.67, 2.51 |
|              |                       | 0.13                          | 0.45       |
|              | Distribution          | 1.91                          | 2.14       |
|              |                       | 0.87, 4.18                    | 0.88, 5.16 |
|              |                       | 0.11                          | 0.09       |
|              | Restaurant/Service    | 1.12                          | 1.18       |
|              |                       | 0.81, 1.56                    | 0.72, 1.93 |
|              |                       | 0.50                          | 0.51       |
|              | Food Assistance       | 0.42                          | 0.50       |
|              |                       | 0.17, 1.06                    | 0.14, 1.74 |
|              |                       | 0.07                          | 0.28       |

|                                   |                                               |                                        |                              |
|-----------------------------------|-----------------------------------------------|----------------------------------------|------------------------------|
| N=2535                            |                                               |                                        |                              |
| Customer Contact                  | No                                            | Ref                                    | --                           |
|                                   | Yes                                           | 0.84<br>0.62, 1.15<br>0.283            | --                           |
| Quantitative Work Demands Score   |                                               |                                        |                              |
|                                   | Low                                           | Ref                                    | Ref                          |
|                                   | High                                          | 1.91<br>1.42, 2.57<br><0.001<br>N=2466 | 1.49<br>1.03, 2.16<br>0.03   |
| Workplace Safety Climate Score    |                                               |                                        |                              |
|                                   | Low                                           | Ref                                    | Ref                          |
|                                   | High                                          | 0.61<br>0.46, 0.81<br>0.001<br>N=2375  | 0.52<br>0.37, 0.75<br><0.001 |
| Social Support Score*             |                                               |                                        |                              |
|                                   | Low                                           | Ref                                    |                              |
|                                   | High                                          | 0.98<br>0.98, 0.99<br><0.001<br>N=2289 | --                           |
| Workplace Benefits since March 11 |                                               |                                        |                              |
|                                   | Extra "hazard pay" separate from overtime pay | 0.92<br>0.70, 1.21<br>0.550            | --                           |
|                                   | Access to paid sick leave                     | 0.76<br>0.55, 1.04<br>0.086            | 1.00<br>0.67, 1.50<br>0.99   |
|                                   | Made it easier to take sick leave if needed   | 0.66<br>0.48, 0.91<br>0.010            | --                           |
|                                   | Paid family sick leave                        | 0.95<br>0.59, 1.52<br>0.827            | --                           |
|                                   | Free/discounted food                          | 1.26<br>0.89, 1.81<br>0.213            | --                           |

|                                                                                                                                                                                                                                                                                            |                                                     |                                        |                              |
|--------------------------------------------------------------------------------------------------------------------------------------------------------------------------------------------------------------------------------------------------------------------------------------------|-----------------------------------------------------|----------------------------------------|------------------------------|
|                                                                                                                                                                                                                                                                                            | Health Insurance                                    | 0.96<br>0.66, 1.39<br>0.832            | --                           |
|                                                                                                                                                                                                                                                                                            | Free COVID-19 Testing                               | 1.25<br>0.86, 1.80<br>0.242            | --                           |
|                                                                                                                                                                                                                                                                                            | Covering medical costs if an employee gets COVID-19 | 0.92<br>0.57, 1.49<br>0.746            | --                           |
|                                                                                                                                                                                                                                                                                            | Child/Elder Care                                    | 1.46<br>0.67, 3.14<br>0.334            | --                           |
|                                                                                                                                                                                                                                                                                            | Private Transportation                              | 1.39<br>0.49, 3.99<br>0.538            | --                           |
| <b>"It is worth the health risk to reopen the economy as soon as possible"</b>                                                                                                                                                                                                             | Strongly/disagree                                   | Ref                                    | Ref                          |
|                                                                                                                                                                                                                                                                                            | Neutral                                             | 1.29<br>0.89, 1.87<br>0.176            | 1.44<br>0.95, 2.16<br>0.08   |
|                                                                                                                                                                                                                                                                                            | Strongly/Agree                                      | 2.27<br>1.56, 3.30<br><0.001<br>N=2114 | 2.43<br>1.58, 3.73<br><0.001 |
| Transportation                                                                                                                                                                                                                                                                             | Bus or public transit                               | Ref                                    | --                           |
|                                                                                                                                                                                                                                                                                            | Drive/walk/bike (traveled self)                     | 0.62<br>0.28, 1.40<br>0.255            | --                           |
|                                                                                                                                                                                                                                                                                            | Carpool/taxi/rideshare                              | 0.72<br>0.27, 1.91<br>0.507            | --                           |
| <p>*Fully adjusted model includes: Workplace Safety Climate, work demands, access to paid sick leave, food security score, perspectives on reopening the economy, age, gender, race, ethnicity, food system sector, hourly status, and organization size.</p> <p>Ref = Reference value</p> |                                                     |                                        |                              |
